# Supplementary material for: Improved outcome of pediatric patients with acute megakaryoblastic leukemia in the AML-BFM 04 trial
Source: PubMed Central journal article supplement (PMC4488462; doi:10.1007/s00277-015-2383-2), 2015-04-28
Supplement: 277_2015_2383_MOESM2_ESM.pdf [file 277_2015_2383_MOESM2_ESM.pdf]

## Supplementary Figures:

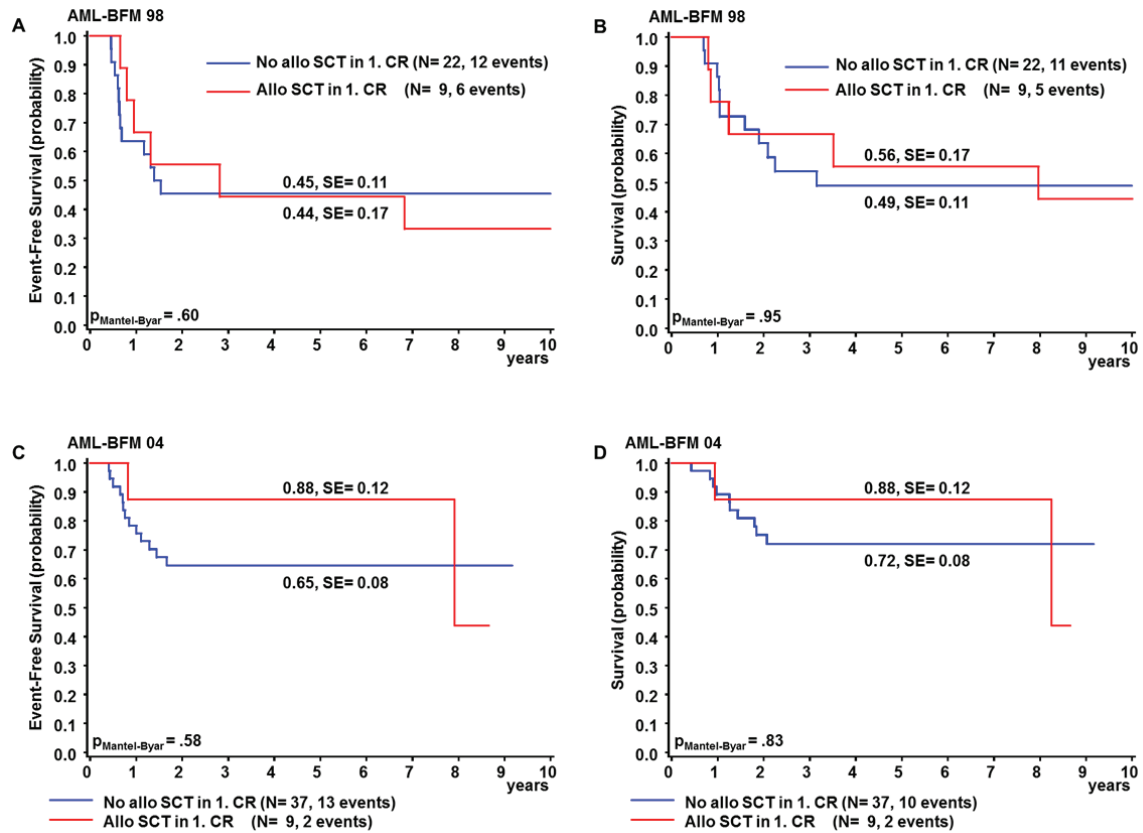

**Supplementary Figure S1: Outcome of AMKL patients treated with allogeneic HSCT in CR1 or to chemotherapy only for the AML-BFM 98 or AML-BFM 04 study.** (A) Event-free survival in AML-BFM 98. (B) Overall survival in AML-BFM 98. (C) Event-free survival in AML-BFM 04. (D) Overall survival in AML-BFM 04. Patients without SCT and EFS below the median time to transplantation (0.4 years) were excluded. 5-year probabilities are given.
