# Supplementary material for: Improved outcome of pediatric patients with acute megakaryoblastic leukemia in the AML-BFM 04 trial
Source: PubMed Central journal article supplement (PMC4488462; doi:10.1007/s00277-015-2383-2), 2015-04-28
Supplement: 277_2015_2383_MOESM3_ESM.pdf [file 277_2015_2383_MOESM3_ESM.pdf]

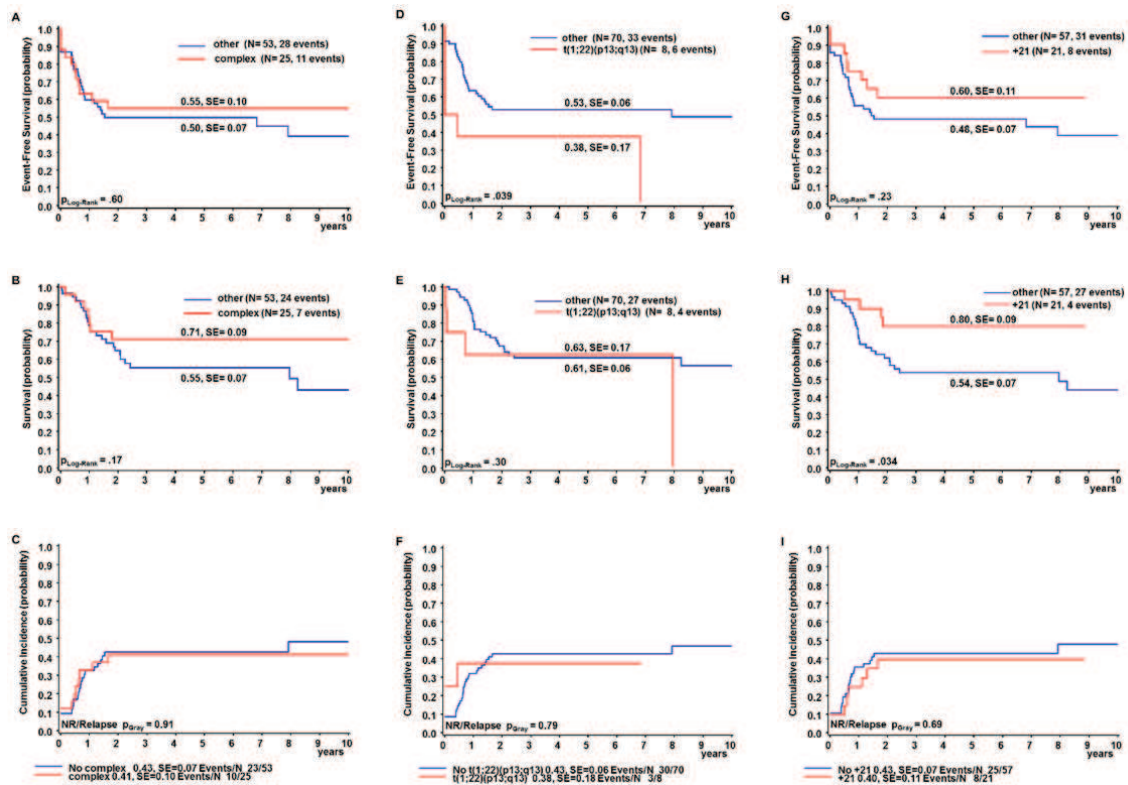

**Supplementary Figure S2: Estimated probability of EFS (A, D, G), overall survival (B, E, H) and CIR (C, F, I) for AMKL patients (n=78) based on cytogenetic data:** (A-C) Patients with or without complex karyotype. (D-F) Patients with or without t(1;22)(p13;q13). (G-I) Patients with or without gain of chromosome 21. 5-year probabilities are given.
