# Supplementary material for: Improved outcome of pediatric patients with acute megakaryoblastic leukemia in the AML-BFM 04 trial
Source: PubMed Central journal article supplement (PMC4488462; doi:10.1007/s00277-015-2383-2), 2015-04-28
Supplement: 277_2015_2383_MOESM4_ESM.pdf [file 277_2015_2383_MOESM4_ESM.pdf]

**Supplementary Table:****Supplementary Table S1: Characteristics of eight AMKL patients with t(1;22)(p13;q13)**

| Patient | Age (y) | Sex | Karyotype                                                                                                                         | Therapy    | Outcome                     |
|---------|---------|-----|-----------------------------------------------------------------------------------------------------------------------------------|------------|-----------------------------|
| #1      | 0.12    | m   | 46,XY,t(1;22)(p13;q13)[8]                                                                                                         | AML-BFM 98 | Death in CCR after MUD HSCT |
| #2      | 0.24    | f   | 46,XX,t(1;22)(p13;q13)[13]                                                                                                        | AML-BFM 04 | CCR after MUD HSCT in NR    |
| #3      | 0.59    | f   | no karyotype, t(1;22)(p13;q13) in FISH                                                                                            | AML-BFM 04 | Early Death                 |
| #4      | 0.30    | f   | 46,XX,inv(7)(q21q33)[18]; 46,idem,t(1;22)(p31;q12)[2]                                                                             | AML-BFM 04 | CCR after MRD HSCT in NR    |
| #5      | 1.19    | m   | 49,XY,t(1;22)(p13;q13),+2,der(2)(p),+8,+19[cp11]                                                                                  | AML-BFM 04 | CR                          |
| #6      | 1.52    | f   | no karyotype, t(1;22)(p13;q13) in FISH                                                                                            | AML-BFM 04 | Early Death                 |
| #7      | 0.25    | m   | 50~55,t(1;22)(p13;q13),inc                                                                                                        | AML-BFM 98 | CR                          |
| #8      | 6.26    | m   | 68~69,XXYY,der(1)t(1;22)(p13;q13),-1,-2,-4,-4,-5,-5,-6,-7,-9,-9,-11,-12,-12,-13,-14,-15,-15,-16,-17,-18,-18,-20,-20,-22,+mar[cp5] | AML-BFM 98 | Death in CCR                |
